# Supplementary material for: Long-term potentiation reconstituted with an artificial TARP/PSD-95 complex
Source: PubMed Central journal article supplement (PMC9797105; doi:10.1016/j.celrep.2022.111483), 2022-10-11
Supplement: NIHMS1842063-supplement-1.pdf [file NIHMS1842063-supplement-1.pdf]

**Cell Reports, Volume 41**

**Supplemental information**

**Long-term potentiation reconstituted  
with an artificial TARP/PSD-95 complex**

**Anagh Sinha Ravi, Menglong Zeng, Xudong Chen, Gerardo Sandoval, Javier Diaz-Alonso, Mingjie Zhang, and Roger A. Nicoll**

# AMPA replacement with GluA1-TARP $\gamma$ -8\_TRP15

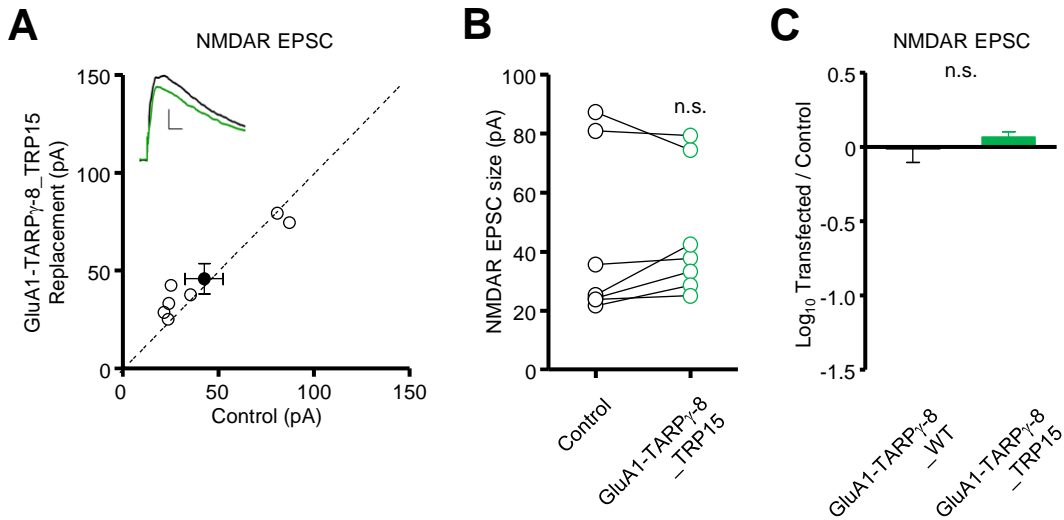

Figure S1: Expression of GluA1-TARP  $\gamma$ -8\_TRP15 does not affect NMDAR EPSCs in AMPAR-null cells. Related to Figure 2. (A) Simultaneous dual whole-cell recordings were made from a transfected CA1 pyramidal neuron (green trace) and from a neighboring wild-type one (black trace). GluA1-TARP  $\gamma$ -8\_TRP15 replacement has no effect on NMDAR EPSCs. Scatterplots showing amplitudes of NMDAR EPSCs for single pairs (open circles) and mean  $\pm$  SEM (filled circle) of control and GluA1-TARP  $\gamma$ -8\_TRP15 replacement neurons. Insets show representative EPSC traces (scale bars, 50 pA, 20 ms,  $n = 7$  paired recordings). (B) Dot-plots showing amplitudes of NMDAR EPSCs for single pairs of control (black) and GluA1-TARP  $\gamma$ -8\_TRP15 (green) replacement neurons. (C) AMPAR replacement with either GluA1-TARP  $\gamma$ -8 or GluA1-TARP  $\gamma$ -8\_TRP15 does not affect NMDAR EPSCs ( $n = 7$  paired recordings, reproduced from (Zeng et al., 2019) for comparison). Bar graphs showing the  $\log_{10}$  transfected/control EPSC ratio  $\pm$  SEM. Statistical significance was analyzed using the Wilcoxon signed-rank test in (B). Unpaired t-test with Welch's correction was used to compare relevant groups in (C). ns, not significant.

## PSD-95\_INAD PDZ3 OE HIGH expression

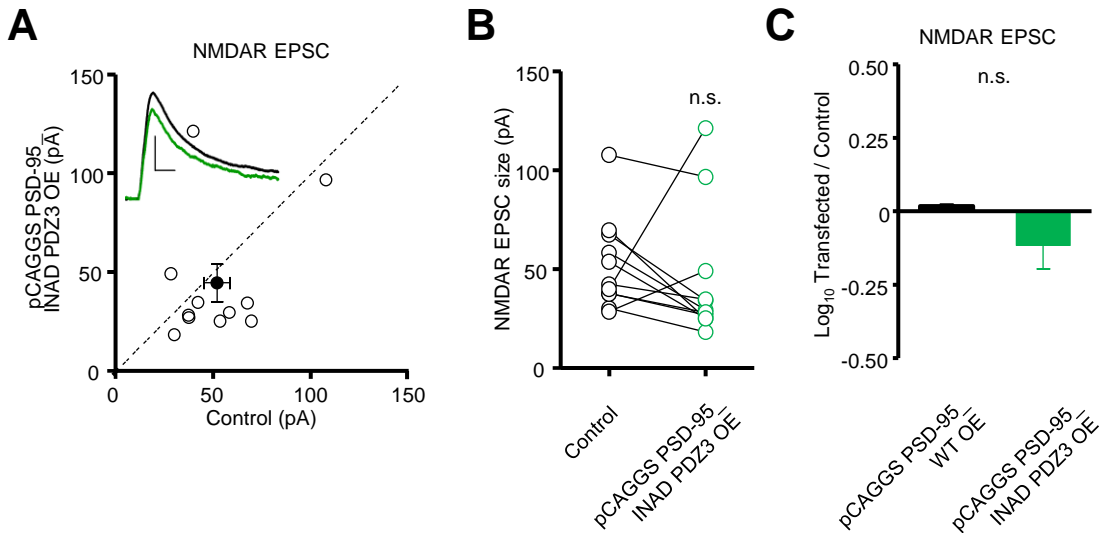

## PSD-95\_INAD PDZ3 OE LOW expression

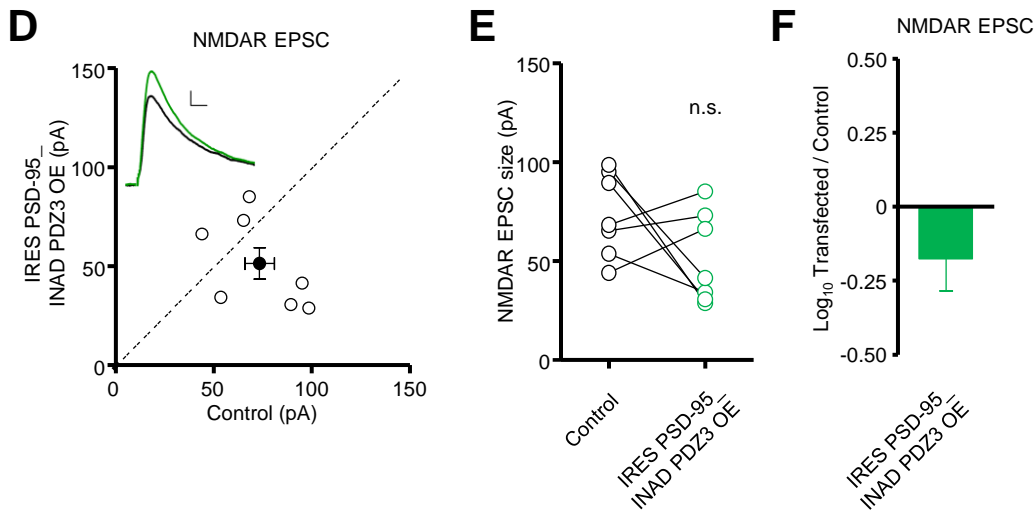

Figure S2: Overexpressing PSD-95\_INAD PDZ3 does not affect NMDAR synaptic transmission. Related to Figure 3. (A) Overexpression of pCAGGS PSD-95\_INAD PDZ3 does not affect NMDAR EPSC size. Scatterplots showing amplitudes of NMDAR EPSCs for single pairs (open circles) and mean  $\pm$  SEM (filled circle) of control (black trace) and pCAGGS PSD-95\_INAD PDZ3 overexpression (green trace) neurons. Insets show representative EPSC traces (scale bars, 50 pA and 20 ms).  $n = 8$  paired recordings. (B) Dot-plots showing amplitudes of NMDAR EPSCs for single pairs of control (black) and pCAGGS PSD-95\_INAD PDZ3 (green) overexpression neurons. (C) Overexpressing WT PSD-95 ( $n = 8$  paired recordings, reproduced from (Fukata et al., 2021) for comparison) or pCAGGS PSD-95\_INAD PDZ3 OE does not affect NMDAR EPSCs. Bar graphs showing the  $\log_{10}$  transfected/control EPSC ratio  $\pm$  SEM. (D) Overexpression of IRES PSD-95\_INAD PDZ3 does not affect NMDAR EPSC size. Scatterplots showing amplitudes of NMDAR EPSCs for single pairs (open circles) and mean  $\pm$  SEM (filled circle) of control (black trace) and IRES PSD-95\_INAD PDZ3 overexpression (green trace) neurons. Insets show representative EPSC traces (scale bars, 50 pA and 20 ms).  $n = 7$  paired recordings. (E) Dot-plots showing amplitudes of NMDAR EPSCs for single pairs of control (black) and IRES PSD-95\_INAD PDZ3 (green) overexpression neurons. (F) Overexpression of IRES PSD-95\_INAD PDZ3 does not affect NMDAR EPSCs. Bar graphs showing the  $\log_{10}$  transfected/control EPSC ratio  $\pm$  SEM. Statistical significance was analyzed using the Wilcoxon signed-rank test in (B, E). Unpaired t-test with Welch's correction was used to compare relevant groups in (C). ns, not significant.

## Artificial PDZ-PBM reconstitution

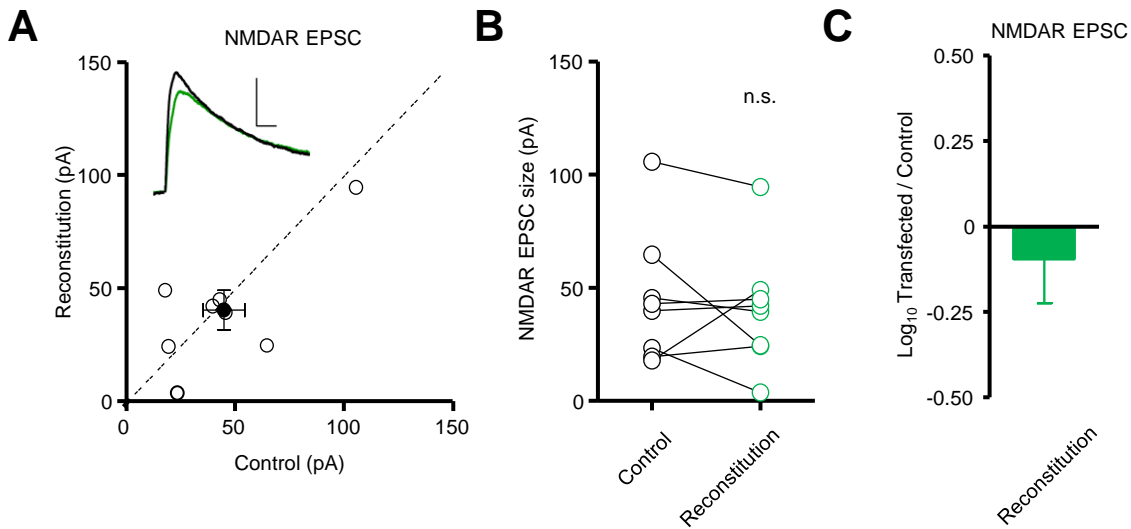

Figure S3: Co-expression of GluA1-TARP  $\gamma$ -8\_TRP15 and PSD-95\_INAD PDZ3 in AMPAR-null neurons does not affect NMDAR transmission. Related to Figure 4. (A) Simultaneous dual whole-cell recordings were made from a transfected CA1 pyramidal neuron (green trace) and a neighboring wild-type one (black trace). Insets show representative EPSC traces (scale bars: 50 pA, 20 ms). Scatterplots showing amplitudes of NMDAR EPSCs for single pairs (open circles) and mean  $\pm$  SEM (filled circle) of control and Cre + GluA1-TARP  $\gamma$ -8\_TRP15 + IRES PSD-95\_INAD PDZ3 (Reconstitution) transfected neurons.  $n = 8$  recorded pairs. (B) Dot-plots showing amplitudes of NMDAR EPSCs for single pairs of control (black) and Reconstitution (green) neurons. (C) Co-transfection of Cre, GluA1-TARP  $\gamma$ -8\_TRP15, and IRES PSD-95\_INAD PDZ3 in *Grial-3<sup>fl/fl</sup>* neurons does not affect NMDAR EPSCs. Bar graphs showing the  $\log_{10}$  transfected/control EPSC ratio  $\pm$  SEM. Statistical significance was analyzed using the Wilcoxon signed-rank test in (B). n.s., not significant.

# TARP $\gamma$ -8 deletion

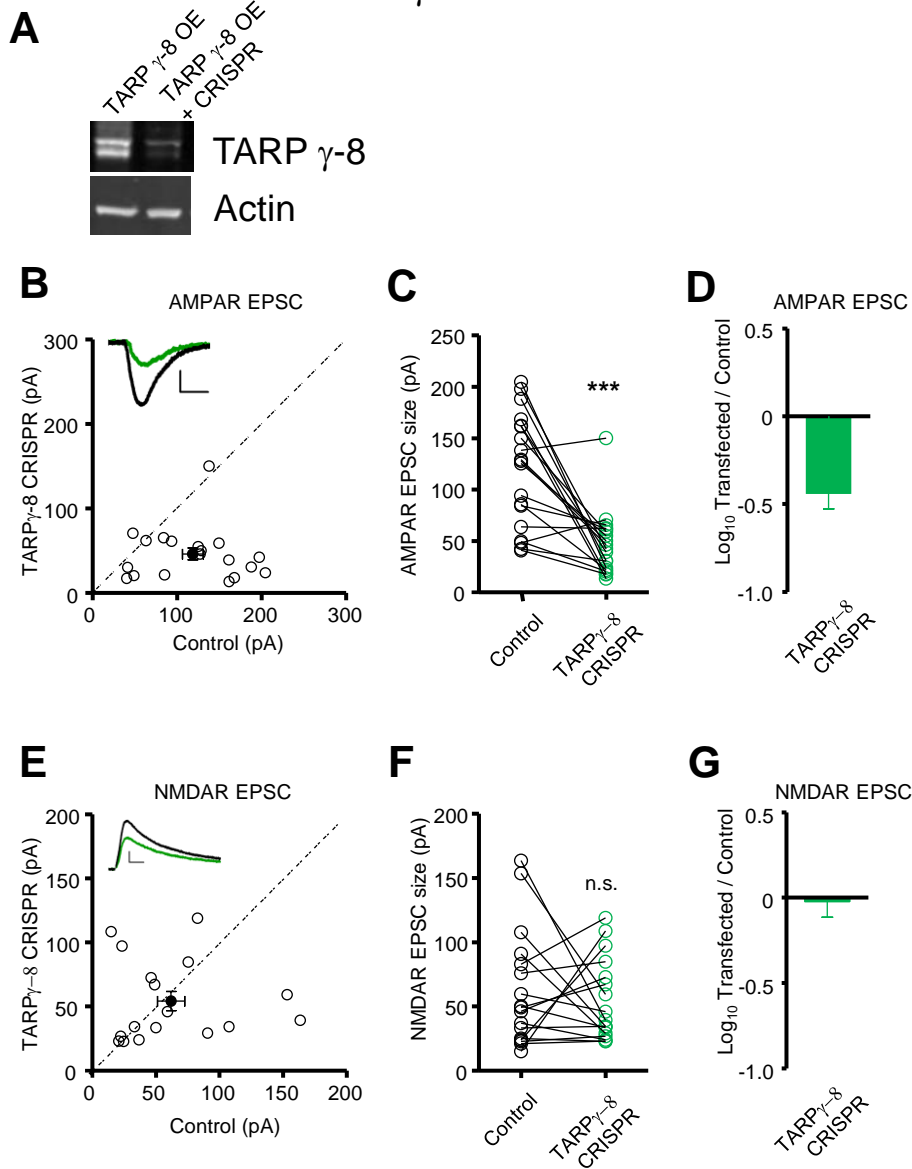

Figure S4: Acute CRISPR deletion of TARP  $\gamma$ -8 in slice culture reduces AMPAR EPSCs but does not affect NMDAR EPSCs. Related to Figure 2 and 4. (A) TARP  $\gamma$ -8 CRISPR deletion is effective in 293T cells. 293T cells were simultaneously transfected for 48 hours with TARP  $\gamma$ -8 overexpression (OE) plasmid and Cas9 alone (left) or TARP  $\gamma$ -8 OE plasmid with TARP  $\gamma$ -8 CRISPR and Cas9 (right). Western blot comparison of protein levels demonstrates effective deletion of TARP  $\gamma$ -8, with  $\beta$ -Actin used as a loading control. This experiment contained 2 technical replicates. The experiment was repeated once, and the results were repeatable. (B) Simultaneous dual whole-cell recordings were made from a transfected CA1 pyramidal neuron (green trace) and a neighboring wild-type one (black trace). Scale bars: 50 pA, 20 ms. Scatterplots showing amplitudes of AMPAR EPSCs for single pairs (open circles) and mean  $\pm$  SEM (filled circle) of control and TARP  $\gamma$ -8 CRISPR + Cas9 transfected neurons.  $n = 19$  recorded pairs. (C) Dot-plots showing amplitudes of AMPAR EPSCs for single pairs of control (black) and TARP  $\gamma$ -8 CRISPR + Cas9 (green) neurons. (D) Bar graphs showing the  $\log_{10}$  transfected/control AMPA EPSC ratio  $\pm$  SEM. (E) Simultaneous dual whole-cell recordings were made from a transfected CA1 pyramidal neuron (green trace) and a neighboring wild-type one (black trace). Scale bars: 50 pA, 20 ms. Scatterplots showing amplitudes of NMDAR EPSCs for single pairs (open circles) and mean  $\pm$  SEM (filled circle) of control and TARP  $\gamma$ -8 CRISPR + Cas9 transfected neurons.  $n = 17$  recorded pairs. These are from the same recordings made in A, minus two cells which were lost before the NMDAR response could be recorded. (F) Dot-plots showing amplitudes of NMDAR EPSCs for single pairs of control (black) and TARP  $\gamma$ -8 CRISPR + Cas9 (green) neurons. (G) Bar graphs showing the  $\log_{10}$  transfected/control NMDA EPSC ratio  $\pm$  SEM. Statistical significance was analyzed using the Wilcoxon signed-rank test in (C, F). \*\*\*  $P < 0.001$ ; n.s. not significant.
